# Supplementary material for: Differential sequence charge clustering and mixing ratio affect stability and dynamics of heterotypic peptide condensates
Source: Royal Society of Chemistry journal article supplement (doi:10.1039/d5cp03436a), 2025-11-25
Supplement: d5cp03436a1.pdf [file d5cp03436a1.pdf]

**Supplementary Data**

**Differential Sequence Charge-clustering and Mixing-ratio  
Affect Stability and Dynamics of Heterotypic Peptide  
Condensates**

Milan Kumar Hazra\*

Department of Chemistry

Indian Institute of Technology, Jodhpur

NH 62, Surpura Bypass Rd, Karwar, Jheepasani, Rajasthan

INDIA, 342030

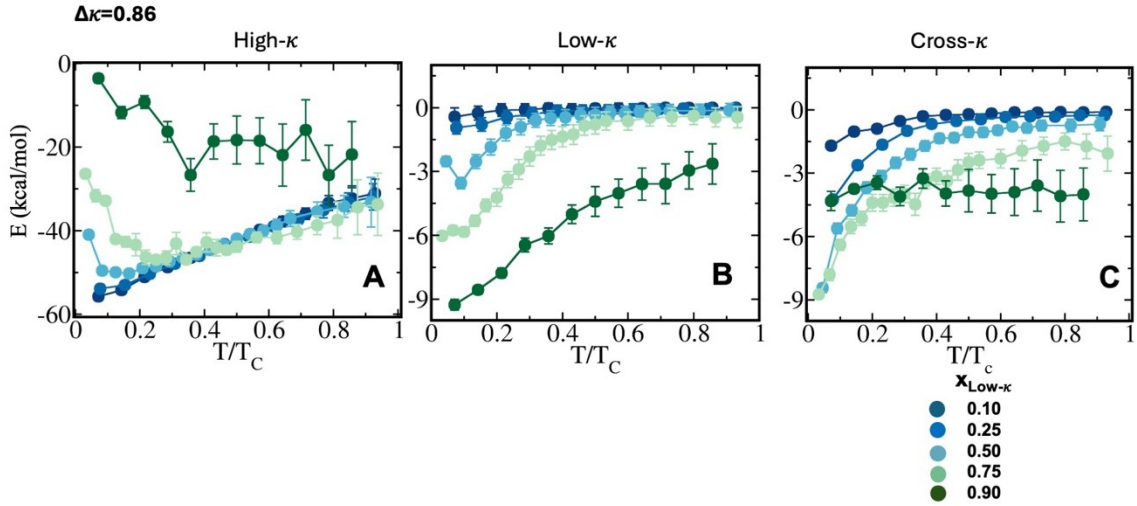

**Figure S1: Dissection of total energy in self- and cross- interaction energy components in heterotypic protein condensates of sequence pairs  $\kappa=1.0$  and  $0.14$ .** (A) Electrostatic energy among high- $\kappa$  peptides that each polymer faces in condensate phase (B) Average electrostatic energy among Low- $\kappa$  peptides that each polymer faces in condensate phase (C) Average electrostatic cross interaction energy among low and high- $\kappa$  peptides that each polymer faces in condensate phase for sequence pairs with differential charge clustering  $\Delta\kappa=0.86$  (sequence  $\kappa=1.0$  and  $0.14$ ). Different mixing fractions have been shown in each panel ranging from  $x_{Low-\kappa}=0.1$  to  $0.9$  with blue to green.

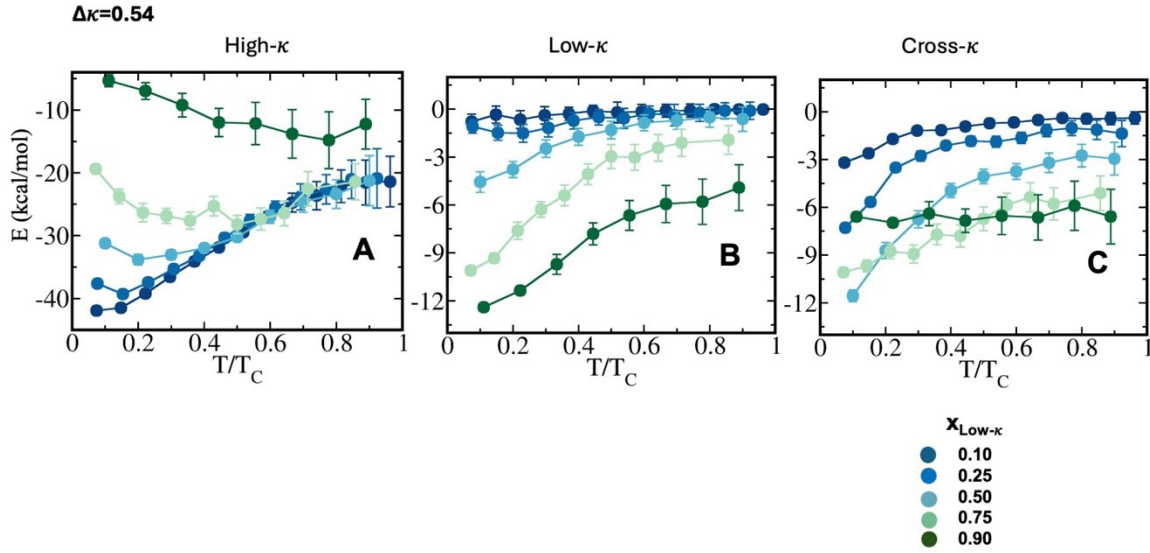

**Figure S2: Dissection of total energy in self- and cross- interaction energy components in heterotypic protein condensate of sequence pairs  $\kappa=0.77$  and  $0.23$ .** (A) Electrostatic energy among high- $\kappa$  peptides that each polymer faces in condensate phase (B) Average electrostatic energy among Low- $\kappa$  peptides that each polymer faces in condensate phase (C) Average electrostatic cross interaction energy among low and high- $\kappa$  peptides that each polymer faces

in condensate phase for sequence pairs with differential charge clustering  $\Delta\kappa=0.54$  (sequence  $\kappa=0.77$  and  $0.23$ ). Different mixing fractions has been shown in each panel ranging from  $x_{Low-\kappa}=0.1$  to  $0.9$  with blue to green.

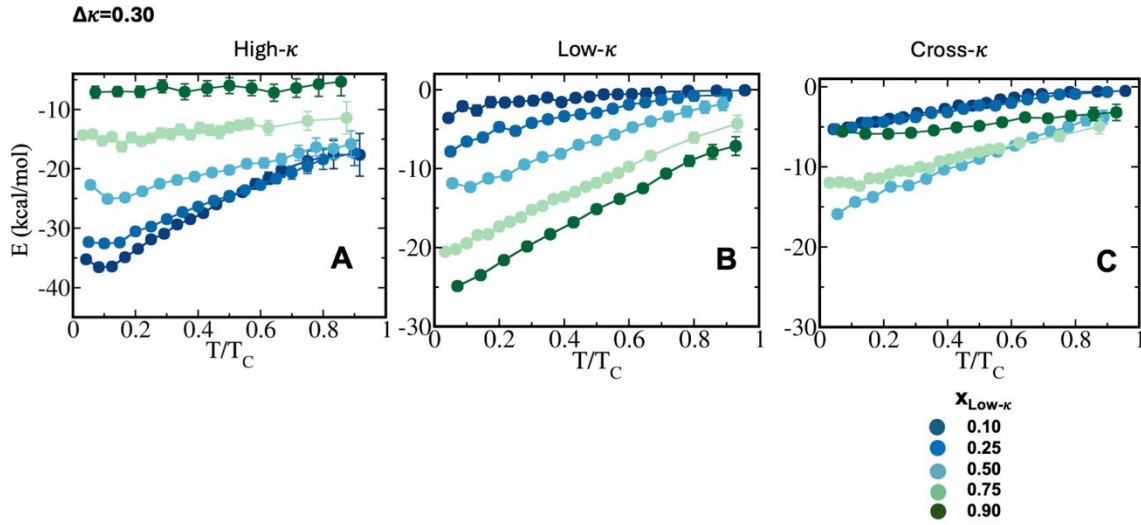

**Figure S3: Dissection of total energy in self- and cross- interaction energy components in heterotypic protein condensate of sequence pairs  $\kappa=0.65$  and  $0.35$ .** (A) Electrostatic energy among high- $\kappa$  peptides that each polymer faces in condensate phase (B) Average electrostatic energy among Low- $\kappa$  peptides that each polymer faces in condensate phase (C) Average electrostatic cross interaction energy among low and high- $\kappa$  peptides that each polymer faces in condensate phase for sequence pairs with differential charge clustering  $\Delta\kappa=0.54$  (sequence  $\kappa=0.65$  and  $0.35$ ). Different mixing fractions has been shown in each panel ranging from  $x_{Low-\kappa}=0.1$  to  $0.9$  with blue to green.

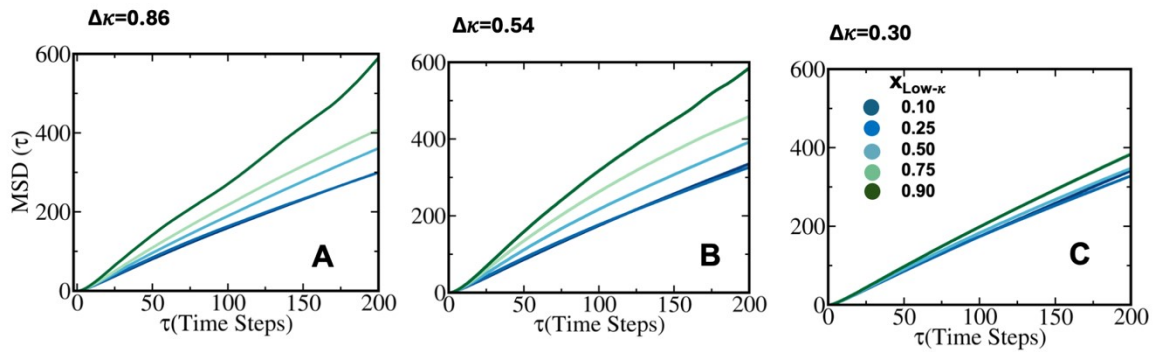

**Figure S4: Average mean squared displacement (MSD) of polymers in droplet phase for differential sequence pairs at absolute  $T^*=0.6$**  (A)  $\Delta\kappa=0.86$  (sequence  $\kappa=1.0$  and  $0.14$ ) (B)  $\Delta\kappa=0.54$  (sequence  $\kappa=0.77$  and  $0.23$ ) (C)  $\Delta\kappa=0.30$  (sequence  $\kappa=0.65$  and  $0.35$ ). Different mixing fractions has been shown in each panel ranging from  $x_{Low-\kappa}=0.1$  to  $0.9$  with blue to green.

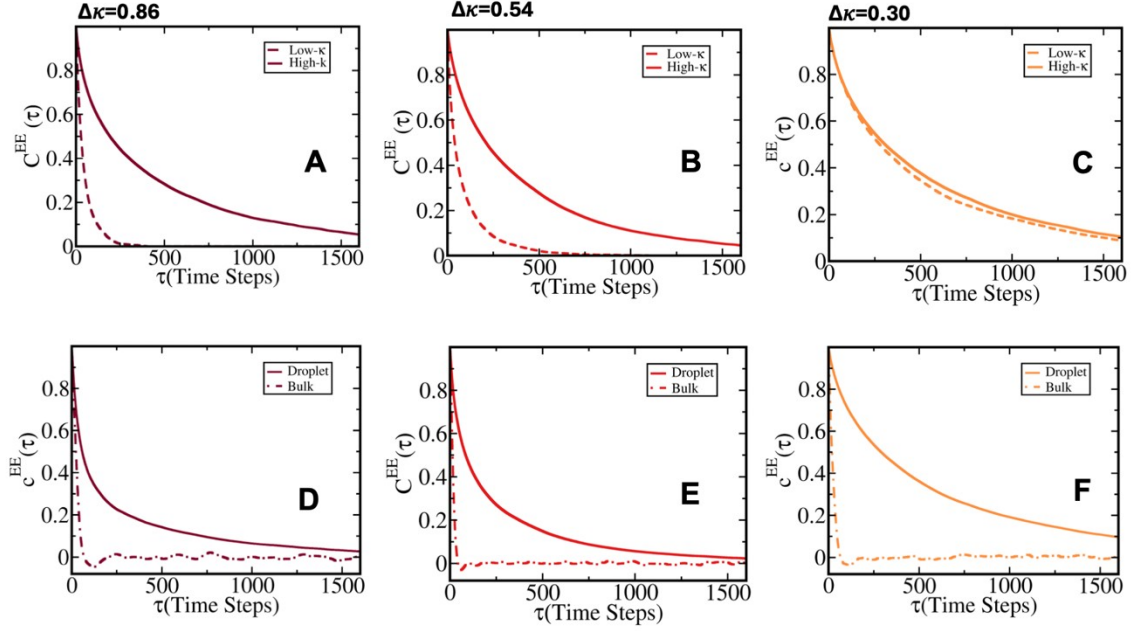

**Figure S5: Chain reconfiguration time correlation analysis in droplet and bulk phase.** Representative time correlation of end-to-end distance vector for low- $\kappa$  and high- $\kappa$  polymers in condensates at  $T/T_c=0.4$  and mixing ratio  $x_{Low-\kappa}=0.5$  with sequence pairs (A)  $\Delta\kappa=0.86$  (sequence  $\kappa=1.0$  and  $0.14$ ) (B)  $\Delta\kappa=0.54$  (sequence  $\kappa=0.77$  and  $0.23$ ) (C)  $\Delta\kappa=0.30$  (sequence  $\kappa=0.65$  and  $0.35$ ). While solid line represents correlation for high- $\kappa$  polymers, dashed line represent low- $\kappa$  polymers. Representative average time correlation of end-to-end distance vector for polymers in condensate and bulk at  $T/T_c=0.4$  and mixing ratio  $x_{Low-\kappa}=0.5$  with sequence pairs (D)  $\Delta\kappa=0.86$  (sequence  $\kappa=1.0$  and  $0.14$ ) (E)  $\Delta\kappa=0.54$  (sequence  $\kappa=0.77$  and  $0.23$ ) (F)  $\Delta\kappa=0.30$  (sequence  $\kappa=0.65$  and  $0.35$ ). While solid line represents correlation in droplet polymers while dot-dashed line represent the same in bulk. Color scheme represent individual  $\Delta\kappa$  variants respectively.

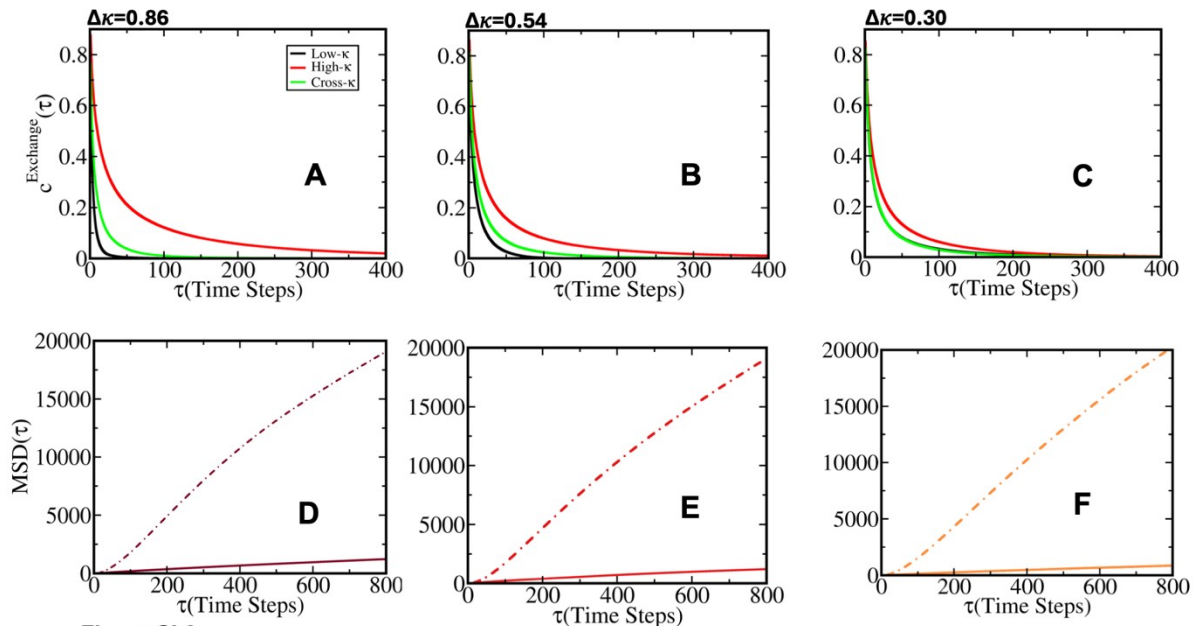

**Figure S6: Representative time correlation of contact exchange in droplet phase** among polymers at  $T/T_c=0.3$  and  $x_{Low-\kappa}=0.5$  for sequence pairs (A)  $\Delta\kappa=0.86$  (sequence  $\kappa=1.0$  and  $0.14$ ) (B)  $\Delta\kappa=0.54$  (sequence  $\kappa=0.77$  and  $0.23$ ) (C)  $\Delta\kappa=0.30$  (sequence  $\kappa=0.65$  and  $0.35$ ). Each panel consists variants of contact lifetime correlation namely among polymers of low- $\kappa$  (black), high- $\kappa$  (red) and cross interaction among high and low  $\kappa$  polymers (green). A comparative analysis of average mean squared displacement (MSD) of polymers in droplet phase and bulk at  $T/T_c=0.3$  and  $x_{Low-\kappa}=0.5$  for differential sequence pair condensates (A)  $\Delta\kappa=0.86$  (sequence  $\kappa=1.0$  and  $0.14$ ) (B)  $\Delta\kappa=0.54$  (sequence  $\kappa=0.77$  and  $0.23$ ) (C)  $\Delta\kappa=0.30$  (sequence  $\kappa=0.65$  and  $0.35$ ) at  $T=0$ . and  $x_{Low-\kappa}=0.5$  for sequence pairs.

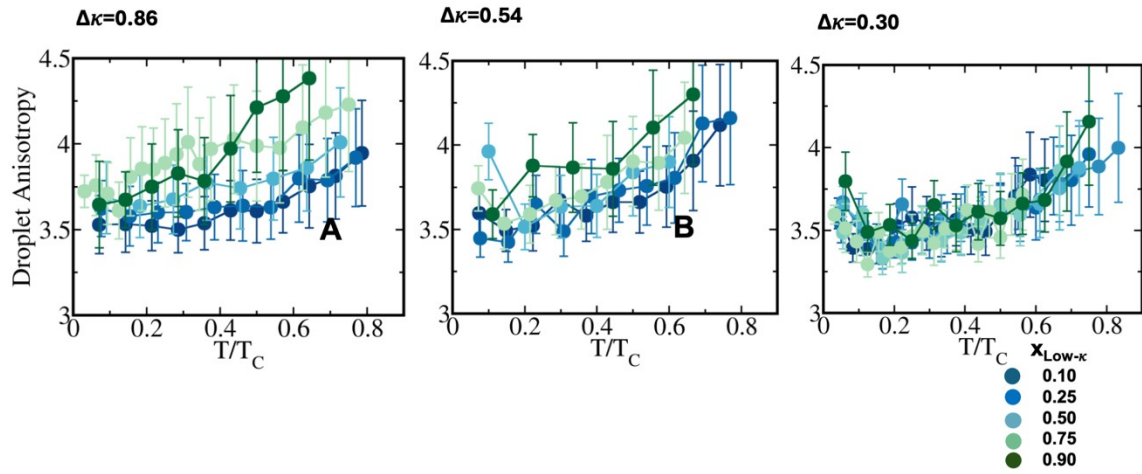

**Figure S7: Shape anisotropy of droplets composed by differential sequence pairs along temperature scaled to criticality** (A)  $\Delta\kappa=0.86$  (sequence  $\kappa=1.0$  and  $0.14$ ) (B)  $\Delta\kappa=0.54$  (sequence  $\kappa=0.77$  and  $0.23$ ) (C)  $\Delta\kappa=0.30$  (sequence  $\kappa=0.65$  and  $0.35$ ). Different mixing fractions has been shown in each panel ranging from  $x_{Low-\kappa}=0.1$  to  $0.9$  with blue to green.

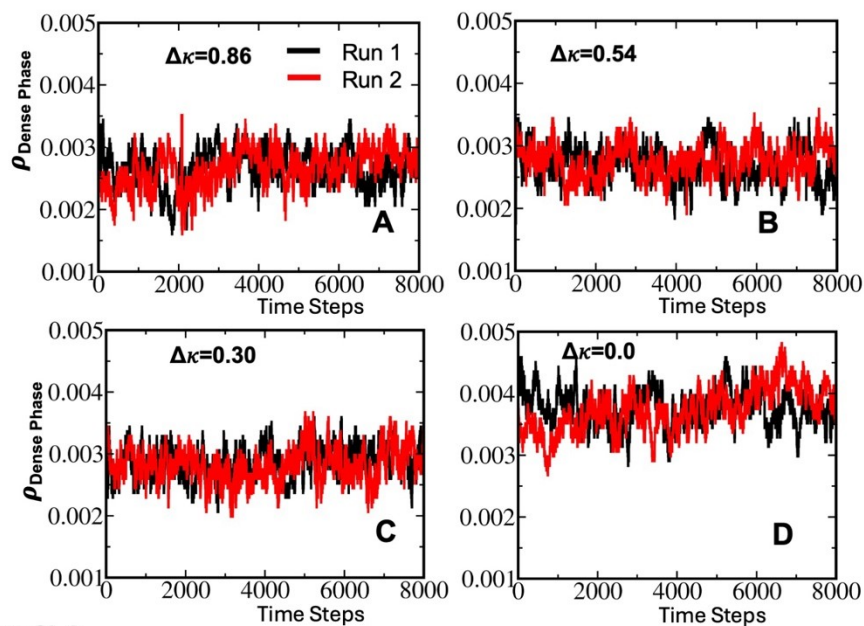

**Figure S8: Convergence of droplet density.** Density of largest cluster at  $X_{\text{Low-}\kappa}=0.5$  and at  $T/T_c=0.4$  for the studied systems (A)  $\Delta\kappa=0.86$ , (B)  $\Delta\kappa=0.54$ , (C)  $\Delta\kappa=0.30$  and (D)  $\Delta\kappa=0.0$  obtained from two independent runs as representative examples.

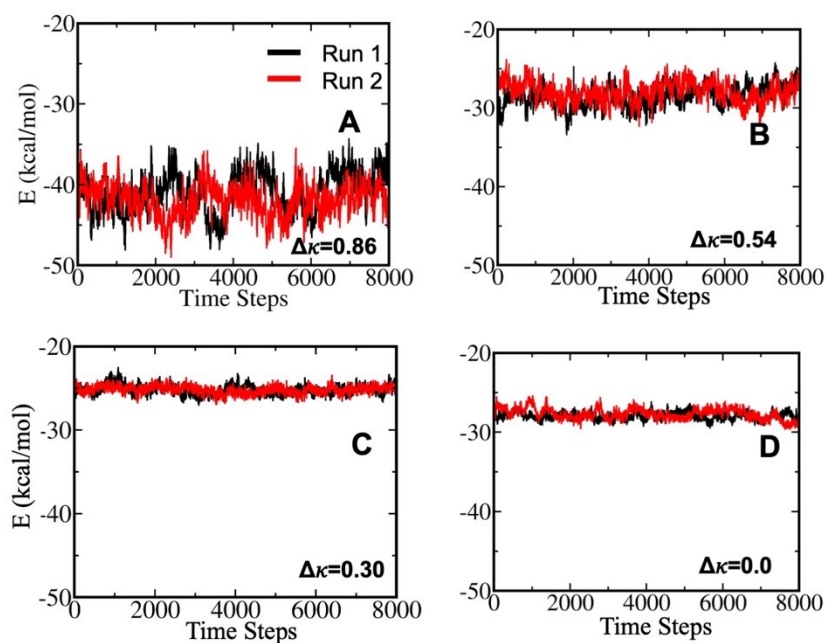

**Figure S9: Convergence of electrostatic interaction energy in dense phase** at  $X_{\text{Low-}\kappa}=0.5$  and at  $T/T_c=0.4$  for the studied systems (A)  $\Delta\kappa=0.86$ , (B)  $\Delta\kappa=0.54$ , (C)  $\Delta\kappa=0.30$  and (D)  $\Delta\kappa=0.0$  obtained from two independent runs as representative examples.

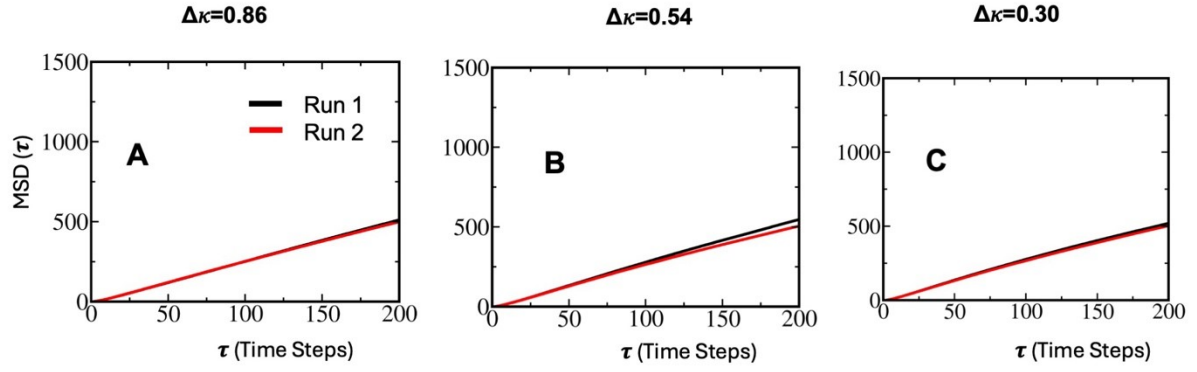

**Figure S10:** Convergence of mean squared displacements of high- $\kappa$  polymers in droplet phase at  $X_{\text{Low-}\kappa}=0.5$  and at  $T/T_c=0.4$  for the studied systems obtained from two independent runs (A)  $\Delta\kappa=0.86$ , (B)  $\Delta\kappa=0.54$ , (C)  $\Delta\kappa=0.30$  as representative examples.

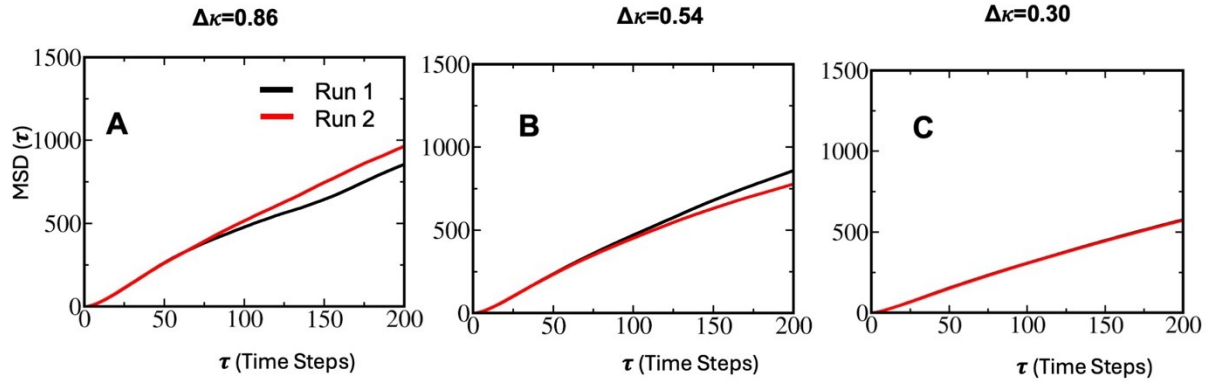

**Figure S11:** Convergence of mean squared displacements of low- $\kappa$  polymers at  $X_{\text{Low-}\kappa}=0.5$  and at  $T/T_c=0.4$  for the studied systems (A)  $\Delta\kappa=0.86$ , (B)  $\Delta\kappa=0.54$ , (C)  $\Delta\kappa=0.30$  obtained from two independent runs as representative examples.

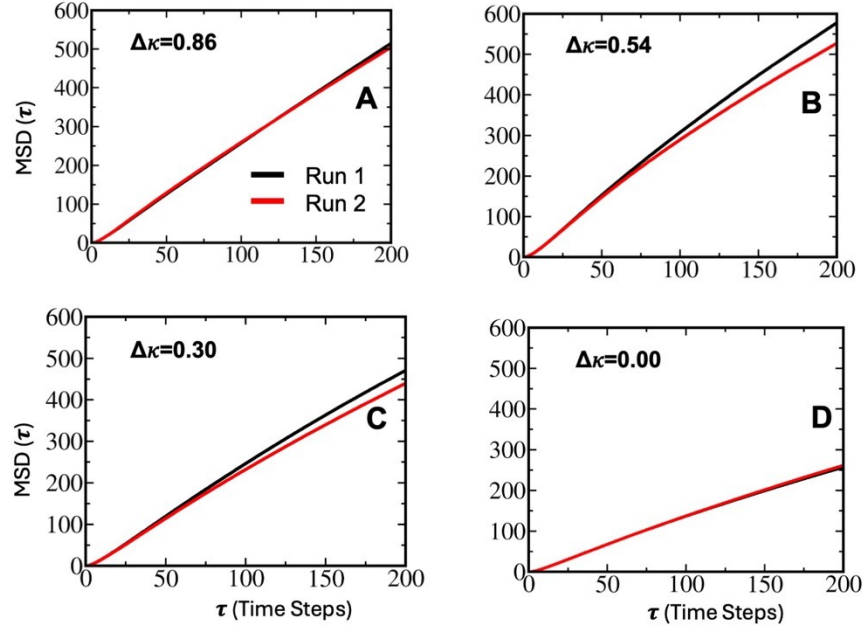

**Figure S12:** Convergence of average mean squared displacement of all polymers at  $X_{\text{Low-}\kappa}=0.5$  and at  $T/T_c=0.4$  for the studied systems obtained from two independent runs (A)  $\Delta\kappa=0.86$ , (B)  $\Delta\kappa=0.54$ , (C)  $\Delta\kappa=0.30$  and (D)  $\Delta\kappa=0.0$  as representative examples.

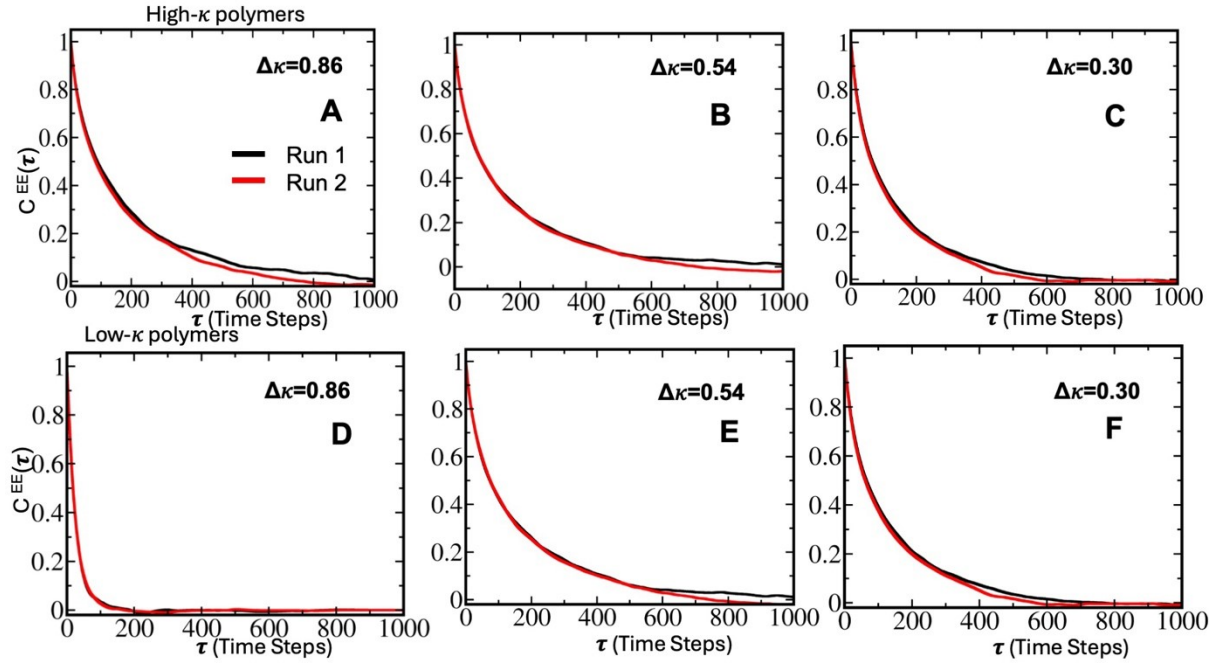

**Figure S13:** (A-C) Convergence of end-to-end distance time correlation function of high- $\kappa$  polymers in droplet phase at  $X_{\text{Low-}\kappa}=0.5$  and at  $T/T_c=0.4$  for the studied systems obtained from two independent runs (A)  $\Delta\kappa=0.86$ , (B)  $\Delta\kappa=0.54$ , (C)  $\Delta\kappa=0.30$  as representative examples. (D-F) Convergence of end-to-end distance time correlation function of low- $\kappa$  polymers in droplet phase at  $X_{\text{Low-}\kappa}=0.5$  and at  $T/T_c=0.4$  for the studied systems obtained

from two independent runs (D)  $\Delta\kappa=0.86$ , (E)  $\Delta\kappa=0.54$ , (F)  $\Delta\kappa=0.30$  as representative examples.

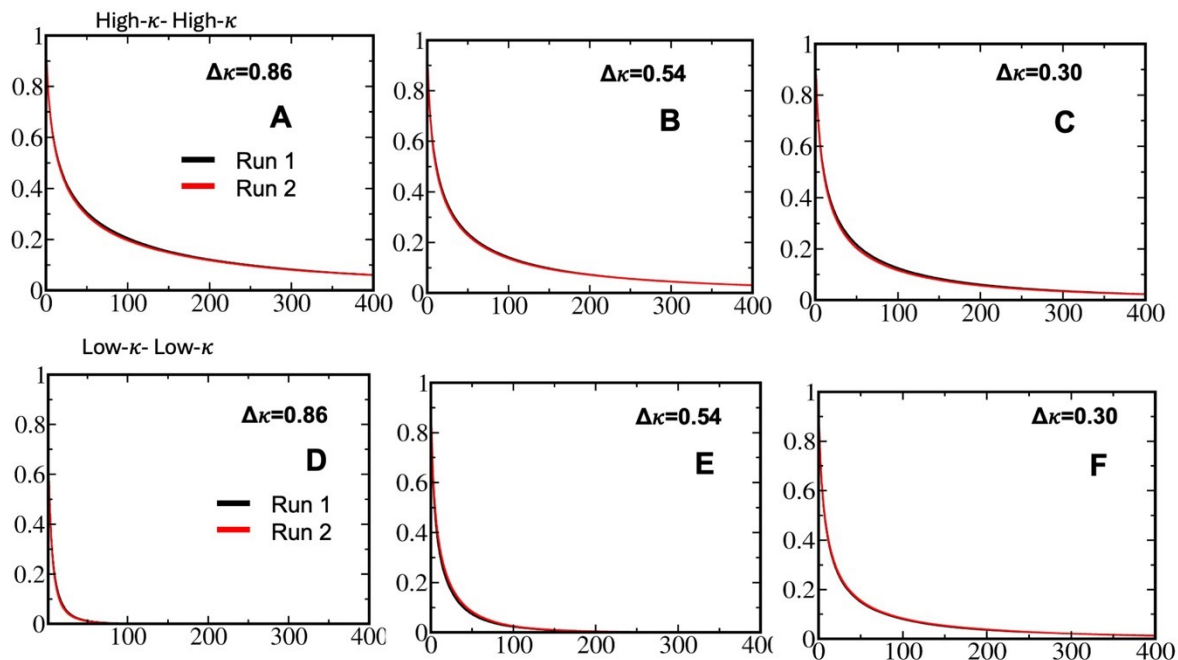

**Figure S14:** (A-C) Convergence of time correlation function delineating neighbour exchange kinetics of high- $\kappa$  polymers in droplet phase at  $X_{\text{Low-}\kappa}=0.5$  and at  $T/T_c=0.4$  for the studied systems obtained from two independent runs (A)  $\Delta\kappa=0.86$ , (B)  $\Delta\kappa=0.54$ , (C)  $\Delta\kappa=0.30$  as representative examples. (D-F) Convergence of time correlation function delineating neighbour exchange kinetics of low- $\kappa$  polymers in droplet phase at  $X_{\text{Low-}\kappa}=0.5$  and at  $T/T_c=0.4$  for the studied systems obtained from two independent runs (D)  $\Delta\kappa=0.86$ , (E)  $\Delta\kappa=0.54$ , (F)  $\Delta\kappa=0.30$  and as representative examples.

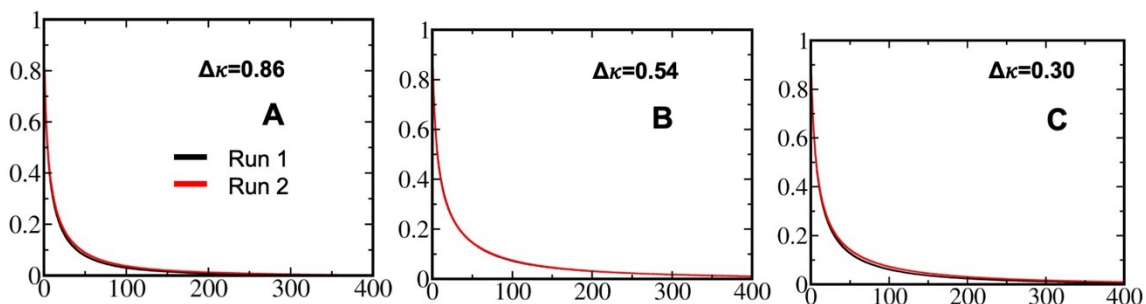

**Figure S15:** Convergence of time correlation function delineating neighbour exchange kinetics among high- $\kappa$  and low- $\kappa$  polymers in droplet phase at  $X_{\text{Low-}\kappa}=0.5$  and at  $T/T_c=0.4$  for the

studied systems obtained from two independent runs (A)  $\Delta\kappa=0.86$ , (B)  $\Delta\kappa=0.54$ , (C)  $\Delta\kappa=0.30$  as representative examples.

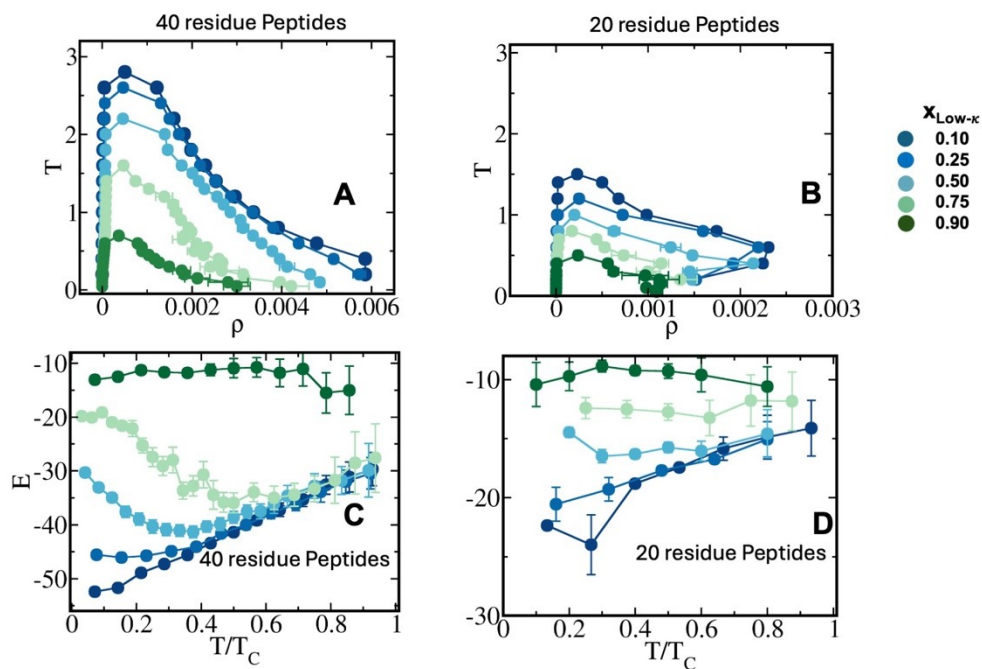

**Figure S16:** Phase diagrams for (A) 40-residue sequence pairs for  $\Delta\kappa=0.86$  has been compared with their (B) 20-residue counterpart to elucidate finite size effect on the reported trends along mixing fractions. Similarly, energetics of droplets assembly has been shown for (C)  $\Delta\kappa=0.86$  sequence pairs with 40-residues and (D) their 20-residue counterpart showcasing similar trends.

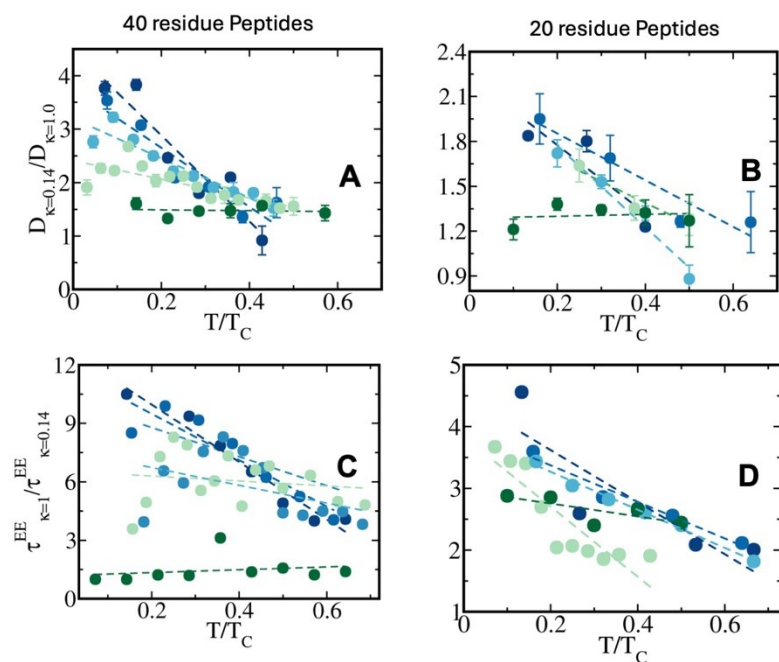

**Figure S17: Effect of finite size on dynamics.** Ratio of diffusivity between low- $\kappa$  and high- $\kappa$

$\frac{D_{Low-k}}{D_{High-k}}$  polymers in condensate phase along temperature for  $\Delta\kappa=0.86$  variant has been compared for systems with (A) 40-residue peptides (B) 20-residue peptides. Average chain

reconfiguration lifetime compared among low- $\kappa$  and high- $\kappa$  ( $\frac{\tau_{high-k}^{EE}}{\tau_{Low-k}^{EE}}$ ) polymers in condensate phase along temperature scaled to criticality for sequence pairs  $\Delta\kappa=0.86$  having (A) 40-residue chains and (B) 20-residue chains.

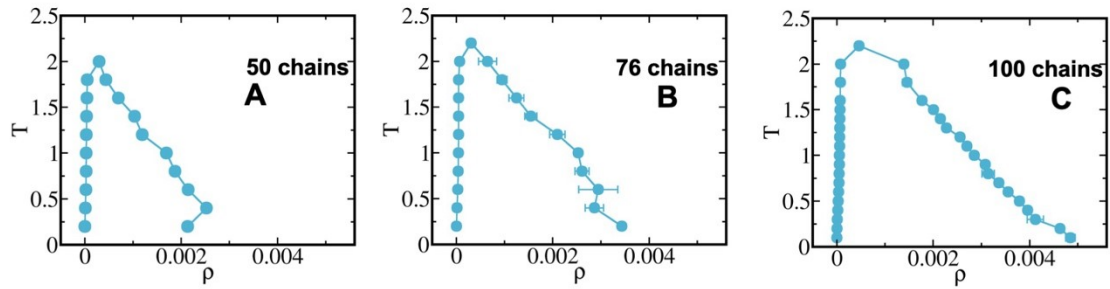

**Figure S18: Representative convergence of phase diagrams** obtained from different system sizes simulated for  $\Delta\kappa=0.86$  variant at  $X_{Low-\kappa}=0.5$  (A) 50 chains (B) 76 chains and (C) 100 chains in the same box  $300 \times 300 \times 300$  Angstrom<sup>3</sup>. The same critical points have been observed for all three systems simulated.
